# Supplementary material for: A Qualitative Study of Emergency Department Delirium Prevention Initiatives
Source: PubMed Central journal article supplement (PMC11259403; doi:10.56392/001c.55690), 2022-12-06
Supplement: NIHMS1954659-supplement-Supplement_-_Interview_Guide.pdf [file NIHMS1954659-supplement-Supplement_-_Interview_Guide.pdf]

Supplementary Material. Interview Questions about ED Delirium Prevention Initiatives

| <i>Question</i>                                                    | <i>Prompts</i>                                                                |
|--------------------------------------------------------------------|-------------------------------------------------------------------------------|
| Please tell me about your delirium prevention initiative.          | What actions does your institution take to prevent delirium?                  |
| How do you determine who receives the intervention?                | What risk factors are used to identify someone at risk for delirium?          |
| Who is responsible for initiating the delirium prevention program? | Triage Nurses? Primary/Bedside Nurses? Physician? Advanced Practice Provider? |
